# Supplementary material
Source: Royal Society of Chemistry journal article supplement (doi:10.1039/d6se00103c)
Supplement: d6se00103c1.pdf [file d6se00103c1.pdf]

## Nanocomposite Electrodes with CuFe Layered Double Hydroxides and Hydrochar for Alkaline HER and HOR: A Multifunctional Platform for Hydrogen Electrocatalysis

Michelle Saliba<sup>a,b</sup>, Philippe Knauth<sup>a</sup>, Emily Bloch<sup>a</sup>, Luca Pasquini<sup>a</sup>, Emanuela Sgreccia<sup>b</sup>, Riccardo Narducci<sup>b</sup>, Alessandra Varone<sup>b</sup>, and Maria Luisa Di Vona<sup>b</sup>

<sup>a</sup>*Aix Marseille Univ, CNRS, MADIREL (UMR 7246) and International Laboratory: Ionomer Materials for Energy, Campus St Jérôme, 13013 Marseille, France*

<sup>b</sup>*University of Rome Tor Vergata, Dep. Industrial Engineering and International Laboratory: Ionomer Materials for Energy, 00133 Roma, Italy*

### Supplementary information

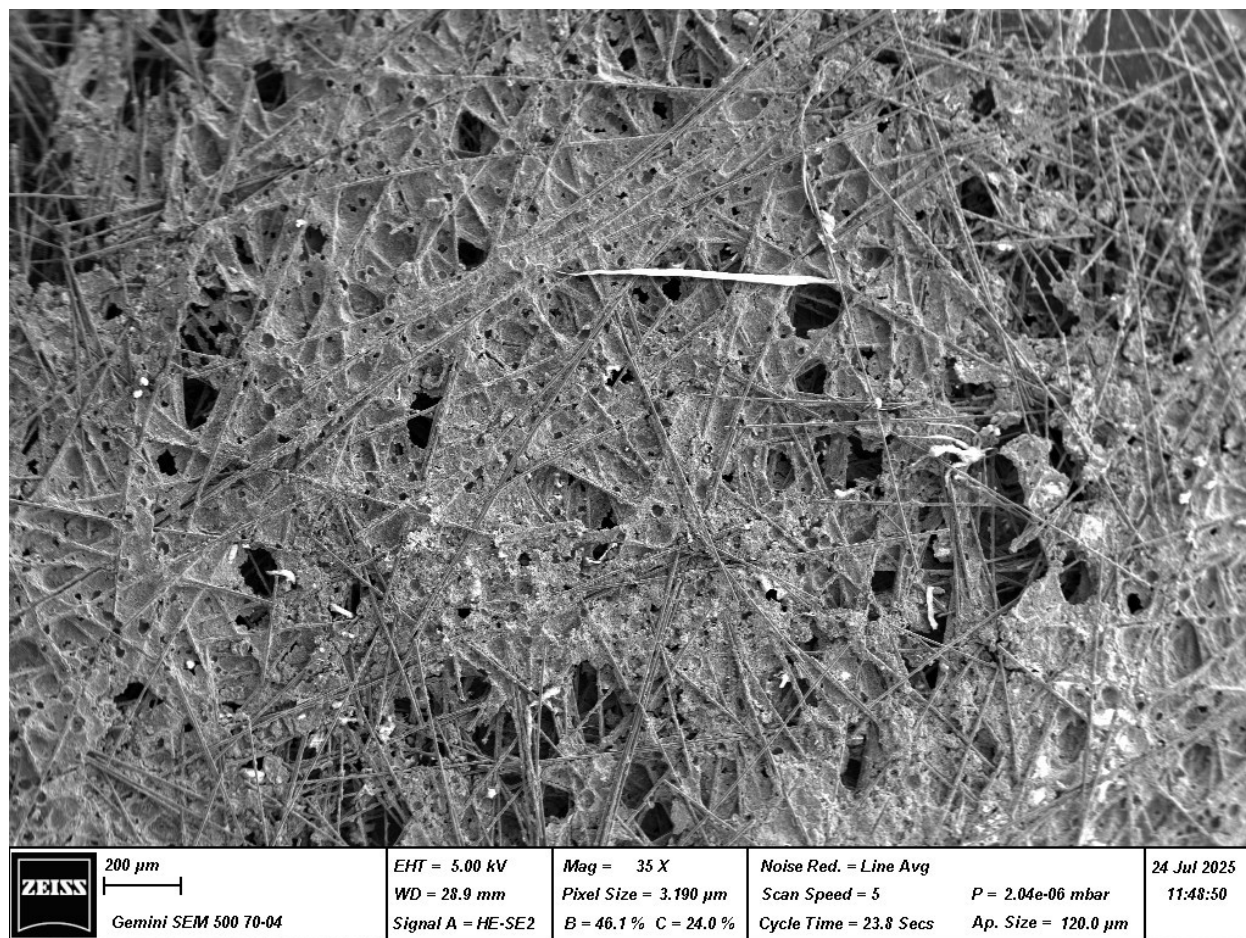



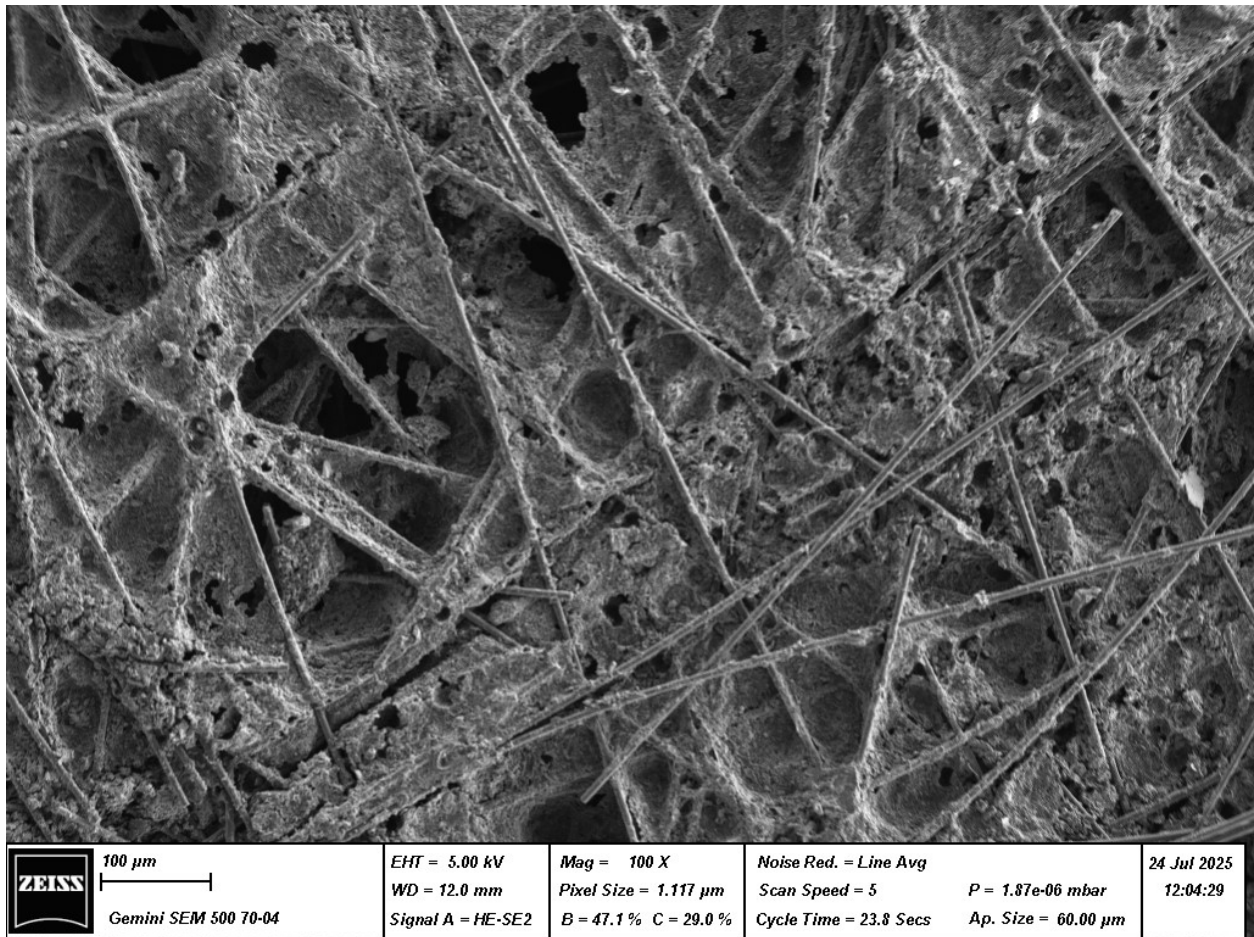

Figure 1. SEM micrographs of LDH-1.5/PPO-LC electrode with different magnifications.

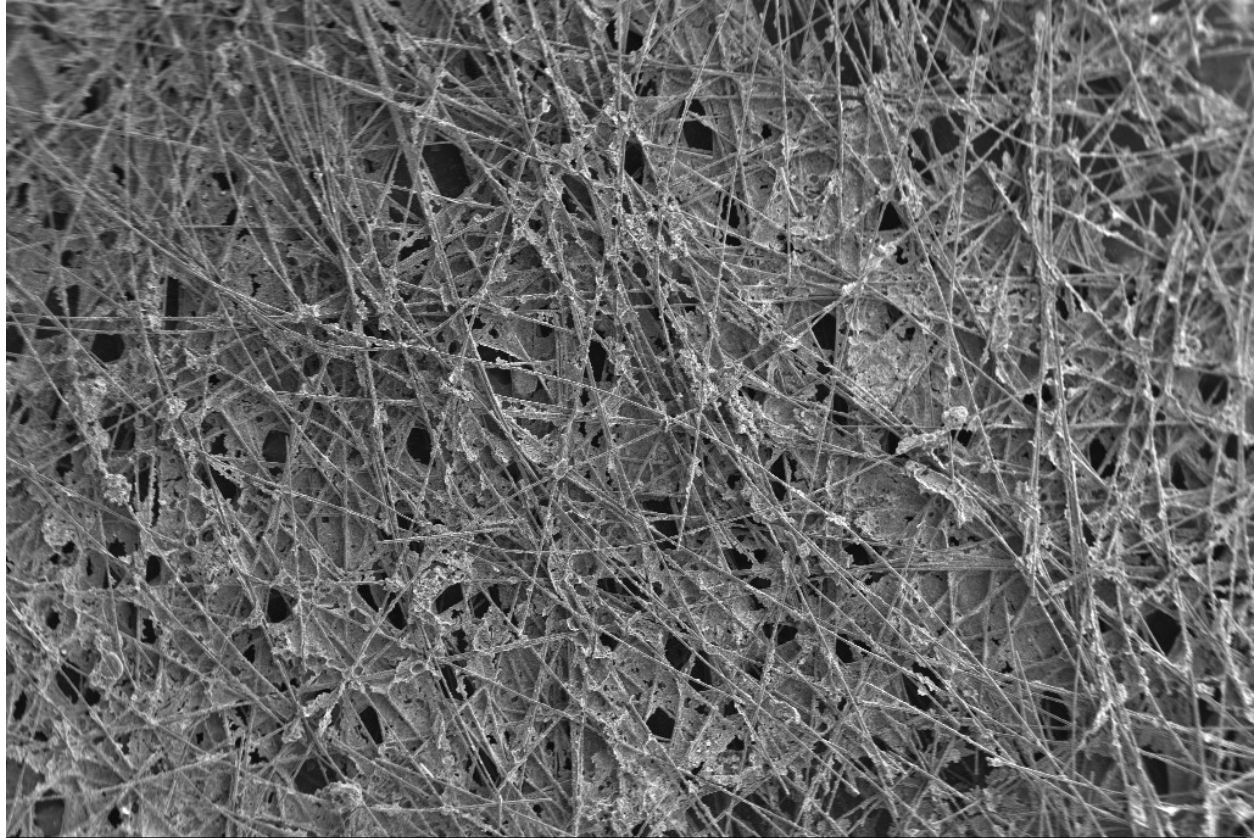

|                                                                                     |                                                                                                                                  |                                                    |                                                                         |                                                                   |                                                     |                         |
|-------------------------------------------------------------------------------------|----------------------------------------------------------------------------------------------------------------------------------|----------------------------------------------------|-------------------------------------------------------------------------|-------------------------------------------------------------------|-----------------------------------------------------|-------------------------|
|  | 200 $\mu\text{m}$<br><br>Gemini SEM 500 70-04 | EHT = 5.00 kV<br>WD = 28.4 mm<br>Signal A = HE-SE2 | Mag = 35 X<br>Pixel Size = 3.190 $\mu\text{m}$<br>B = 47.2 % C = 23.3 % | Noise Red. = Line Avg<br>Scan Speed = 5<br>Cycle Time = 23.8 Secs | P = 1.78e-06 mbar<br>Ap. Size = 120.0 $\mu\text{m}$ | 24 Jul 2025<br>12:34:32 |
|-------------------------------------------------------------------------------------|----------------------------------------------------------------------------------------------------------------------------------|----------------------------------------------------|-------------------------------------------------------------------------|-------------------------------------------------------------------|-----------------------------------------------------|-------------------------|

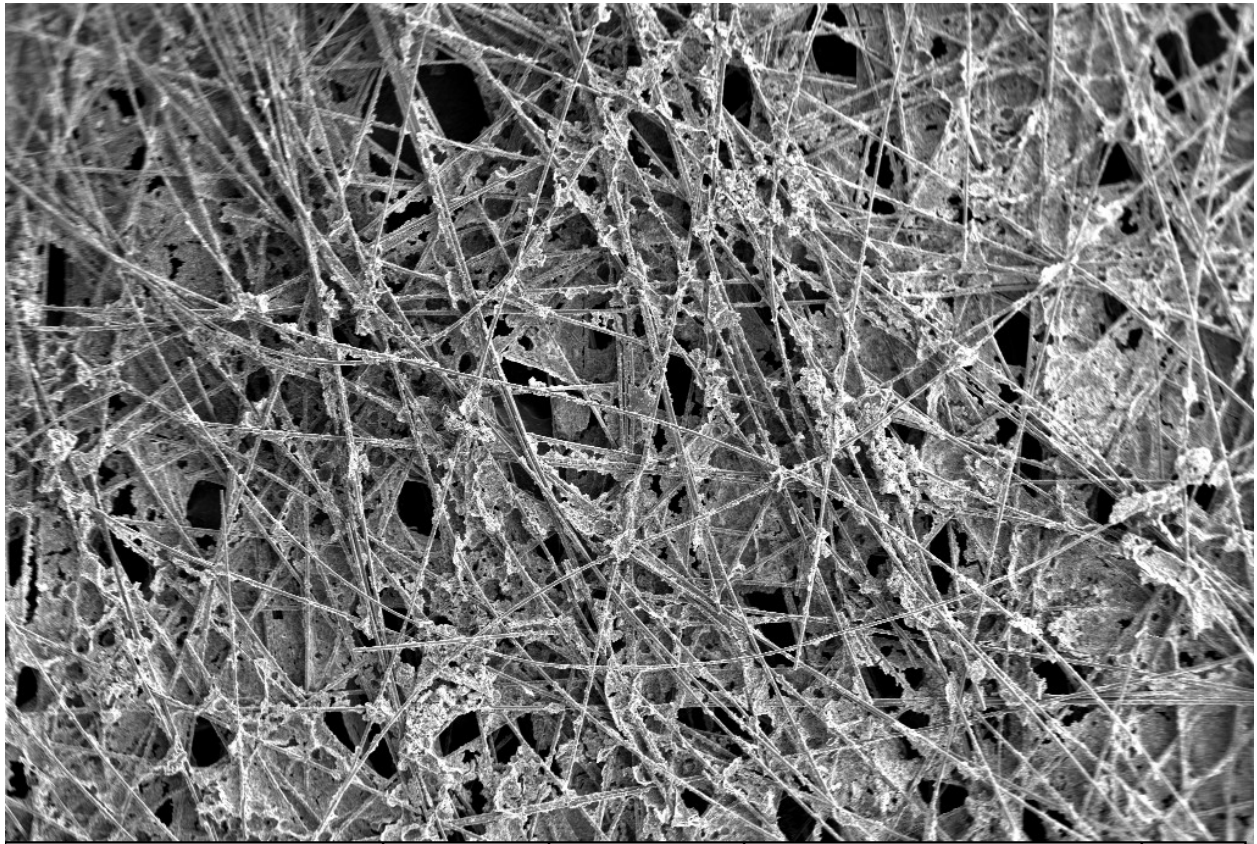

|                                                                                     |                                                                                                                            |                                                    |                                                                   |                                                                   |                                               |                         |
|-------------------------------------------------------------------------------------|----------------------------------------------------------------------------------------------------------------------------|----------------------------------------------------|-------------------------------------------------------------------|-------------------------------------------------------------------|-----------------------------------------------|-------------------------|
|  | 100 $\mu$ m<br><br>Gemini SEM 500 70-04 | EHT = 5.00 kV<br>WD = 18.8 mm<br>Signal A = HE-SE2 | Mag = 50 X<br>Pixel Size = 2.233 $\mu$ m<br>B = 44.6 % C = 24.6 % | Noise Red. = Line Avg<br>Scan Speed = 5<br>Cycle Time = 23.8 Secs | P = 1.37e-06 mbar<br>Ap. Size = 120.0 $\mu$ m | 24 Jul 2025<br>12:39:30 |
|-------------------------------------------------------------------------------------|----------------------------------------------------------------------------------------------------------------------------|----------------------------------------------------|-------------------------------------------------------------------|-------------------------------------------------------------------|-----------------------------------------------|-------------------------|

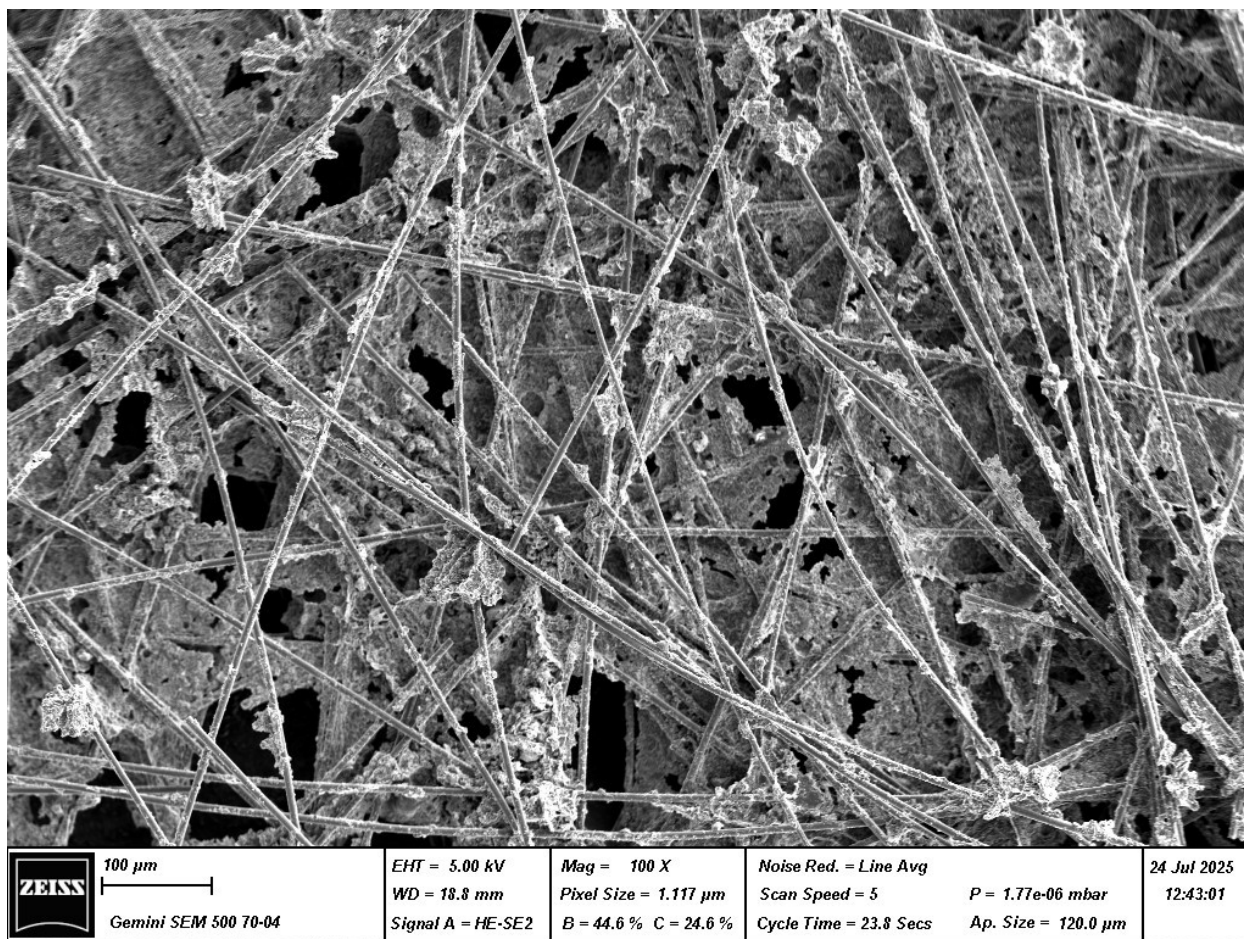

Figure 2. SEM micrographs of LDH-1.5/PPO-LC/Hydrochar electrode with different magnifications.
